# Supplementary material for: Multiplex translaminar imaging in the spinal cord of behaving mice
Source: PubMed Central journal article supplement (PMC10030868; doi:10.1038/s41467-023-36959-2), 2023-03-21
Supplement: 41467_2023_36959_MOESM2_ESM.pdf [file 41467_2023_36959_MOESM2_ESM.pdf]

## Description of Additional Supplementary Files

**Supplementary Movie 1: High-speed blood flow imaging in the spinal cord of an anesthetized FITC-Dextran-injected wild-type mouse.** Example time-lapse recordings (45 fps) acquired with the wearable microscope at 75  $\mu\text{m}$  (left) and 125  $\mu\text{m}$  focal depths (right) in an anesthetized wild-type mouse, injected retro-orbitally with FITC-Dextran (2% w/v). Imaging was performed through a dorsal optical window over the lumbar spinal cord (**Supplementary Fig. 4a-b**). Scale bar, 50  $\mu\text{m}$ . While contrast and resolution are expected to degrade with imaging depth (**Fig. 3**), blood flow remains traceable in small capillaries in vivo.

**Supplementary Movie 2: Multiplex intralaminar imaging of tail pinch-evoked calcium activity in spinal astrocytes and neurons of a behaving mouse.** *Top*, example multi-color fluorescence time-lapse recording of **Fig. 2e-g** showing neuronal nuclei (red) and surrounding astrocytes (green) in the spinal dorsal horn of a behaving mouse. Multiplex imaging through a dorsal optical window was performed ~2.5 weeks after AAV9-CaMKII-H2B-GCaMP7f-TagRFP injection into the lumbar spinal cord of a GFAP-GCaMP6f mouse. Scale bar, 100  $\mu\text{m}$ . *Center and bottom*, color-separated images. Sparse nuclear calcium transients in local excitatory neurons precede widespread astrocyte excitation (**Supplementary Fig. 5c; Discussion**).

**Supplementary Movie 3: High-speed translaminar imaging of tail pinch-evoked calcium activity in the spinal cord of a behaving GFAP-GCaMP6f mouse.** *Top left*, example behavior video showing a GFAP-GCaMP6f mouse with the wearable microscope on a spherical treadmill. This experimental approach facilitates the precise placement of sensory stimuli (e.g., tail pinch) and provides a quantitative readout of locomotor activity. *Bottom left*, simultaneously acquired time-lapse recording (~42.3 fps) showing noxious tail pinch-evoked calcium excitation in spinal astrocytes (**Fig. 4d-e**). The data were obtained at ~75  $\mu\text{m}$  focal depth from the vertical tissue-micropism interface four weeks after micropism implantation. Elapsed time is indicated in the upper right corner. Note that despite the dense tissue labeling, cellular-size large-amplitude transients can be seen throughout the field of view. *Right*, zoom-ins of the three indicated subregions on the bottom left. Noxious pinch triggered coordinated calcium excitation in the central field of view regions corresponding to upper dorsal horn laminae (**Fig. 4a-b**). Some activation in lower parts of the FOV is also seen, likely due to the accompanying brief motor response. Scale bars, 100  $\mu\text{m}$  (bottom left) and 50  $\mu\text{m}$  (right).

**Supplementary Movie 4: High-speed translaminar imaging of motor-evoked calcium activity in the spinal cord of a behaving GFAP-GCaMP6f mouse.** *Top left*, example behavior video showing a GFAP-GCaMP6f mouse with the wearable microscope on a spherical treadmill. This experimental approach provides a quantitative readout of locomotor activity. *Bottom left*, simultaneously acquired time-lapse recording (~40.3 fps) showing running-evoked calcium excitation in spinal astrocytes (**Fig. 4i-j**). The data were obtained at ~75  $\mu\text{m}$  focal depth from the vertical tissue-micropism interface four weeks after micropism implantation. Elapsed time is indicated in the upper right corner. Despite the dense tissue labeling, cellular-size large-amplitude transients can be seen throughout the field of view. *Right*, zoom-ins of the three indicated subregions on the bottom left. Running triggered coordinated calcium excitation in the lower field of view regions likely corresponding to spinal premotor areas (**Fig. 4a-b**). Scale bars, 100  $\mu\text{m}$  (bottom left) and 50  $\mu\text{m}$  (right).

**Supplementary Movie 5: High-speed translaminar imaging of tail pinch-evoked calcium activity in the spinal cord of a behaving Tac1-GCaMP6f mouse.** *Top left*, example behavior video showing a Tac1-GCaMP6f mouse with the wearable microscope on a spherical treadmill. This experimental approach facilitates the precise placement of sensory stimuli (e.g., tail pinch) and provides a quantitative readout of locomotor activity. *Bottom left*, simultaneously acquired time-lapse recording (~43.2 fps) showing noxious tail pinch-evoked calcium excitation in spinal Tac1-expressing neurons. The data were obtained at ~75  $\mu\text{m}$  focal depth from the vertical tissue-micropism interface four weeks after micropism implantation. Elapsed time is indicated in the upper right corner. Despite the dense tissue labeling, cellular-size large-amplitude transients can be seen throughout the field of view. *Right*, zoom-ins of the three indicated subregions on the bottom left. Noxious pinch triggered coordinated calcium excitation in the central field of view regions corresponding to upper dorsal horn laminae (**Fig. 4a-b**). Scale bars, 100  $\mu\text{m}$  (bottom left) and 50  $\mu\text{m}$  (right).
